# Supplementary material
Source: Springer Nature journal article supplement (https://www.springermedizin.de/resource/supplementary/13020_2013_219_MOESM9_ESM.pdf/9641234)

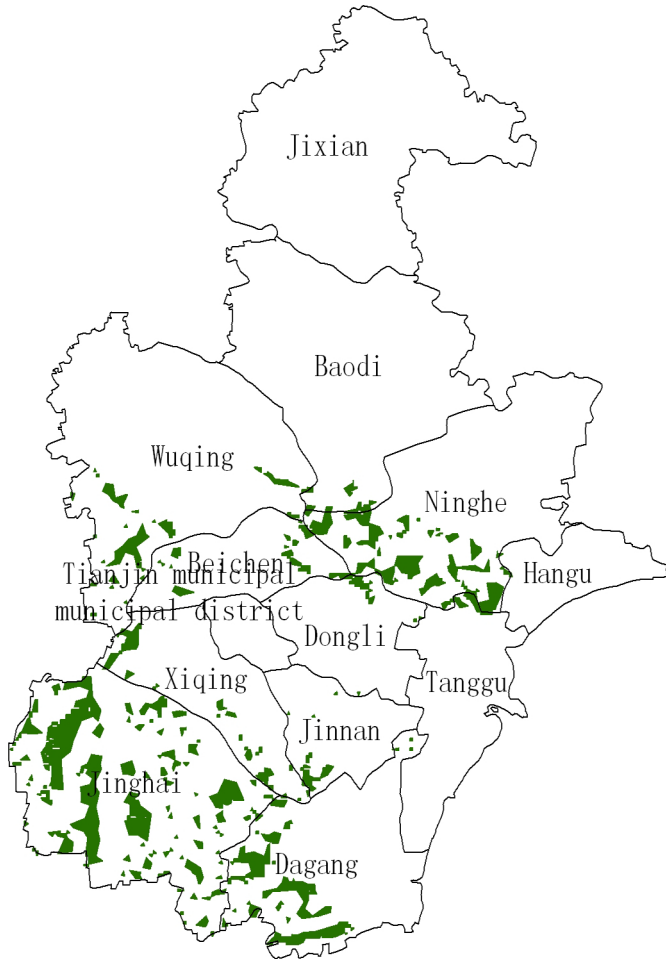

Optimum producing regions for pollution-free *A. bidentata* in Tianjin

Supplement: MOESM9 [file 9641234]
